# Supplementary material
Source: Royal Society of Chemistry journal article supplement (doi:10.1039/d6tc00188b)
Supplement: d6tc00188b1.pdf [file d6tc00188b1.pdf]

**Tuning structural instability in the  
 $\text{Cu}_{12-x}\text{Ni}_x\text{Sb}_4\text{S}_{13}$  ( $x = 0, 0.05, 0.2, 0.5$ ) tetrahedrites**

Oleksandr Bolielyi,<sup>a</sup> Oleksandr Dobrozhan,<sup>a,b</sup> Volodymyr Levytskyi,<sup>a</sup> Alexander A. Tsirlin,<sup>c</sup>  
Roman Pshenychnyi,<sup>b</sup> Andreas Leithe-Jasper<sup>d</sup> and Roman Gumeniuk<sup>\*a</sup>

<sup>a</sup> *Institut für Experimentelle Physik, TU Bergakademie Freiberg, Leipziger Straße 23, 09596 Freiberg, Germany; E-mail: roman.gumeniuk@physik.tu-freiberg.de*

<sup>b</sup> *Department of Electronics and Computer Technology, Sumy State University, 40007, Sumy, Ukraine*

<sup>c</sup> *Felix-Bloch-Institut für Festkörperphysik, Universität Leipzig, Linnéstraße 5, 04103 Leipzig, Germany*

<sup>d</sup> *Max-Planck-Institut für Chemische Physik fester Stoffe, Nöthnitzer Straße 40, 01187 Dresden, Germany*

**Supplemental Materials**

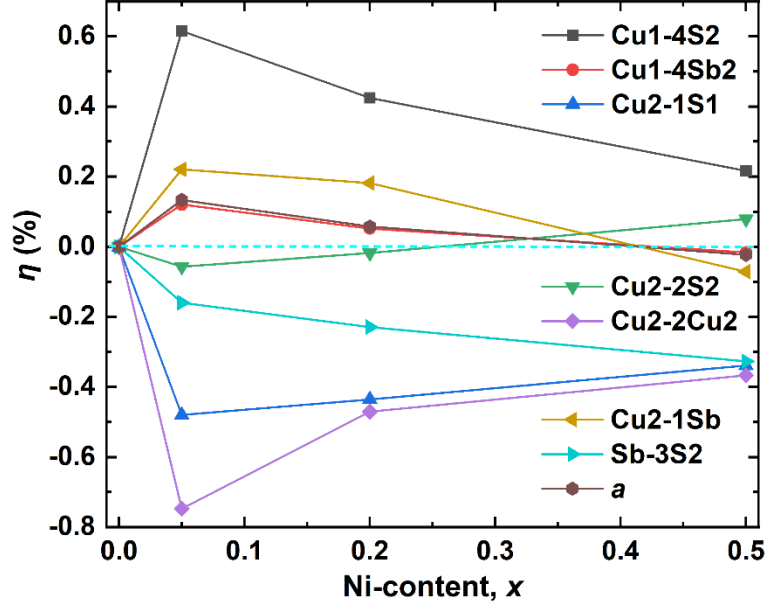

**Fig. S1.** Relative expansion (positive)/contraction (negative) in  $\text{Cu}_{12-x}\text{Ni}_x\text{Sb}_4\text{S}_{13}$  for the bonding interatomic distances in comparison with unit cell parameter  $a$  at room temperature as function of Ni-content  $x$ . Solid lines are guides for eyes only.

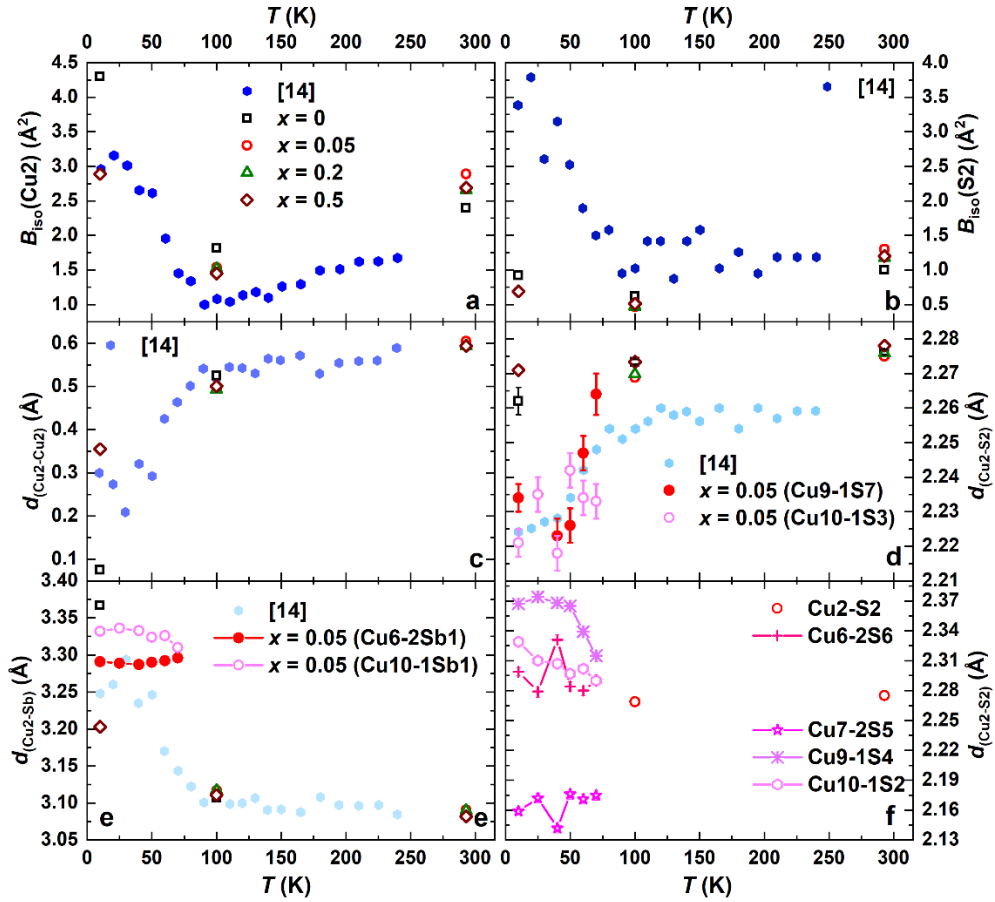

**Fig. S2.** Temperature dependences of  $B_{\text{iso}}$  of Cu2- (a) and S2-atoms (b), as well as interatomic distances Cu2-Cu2 (c), Cu2-S2 (d), Cu2-Sb (e) reported in [14] for cubic  $\text{Cu}_{12}\text{Sb}_4\text{S}_{13}$  in comparison with our data. In (d), (e) and (f) we present some analogous distances observed in the tetragonal structure of  $\text{Cu}_{11.95}\text{Ni}_{0.05}\text{Sb}_4\text{S}_{13}$ .

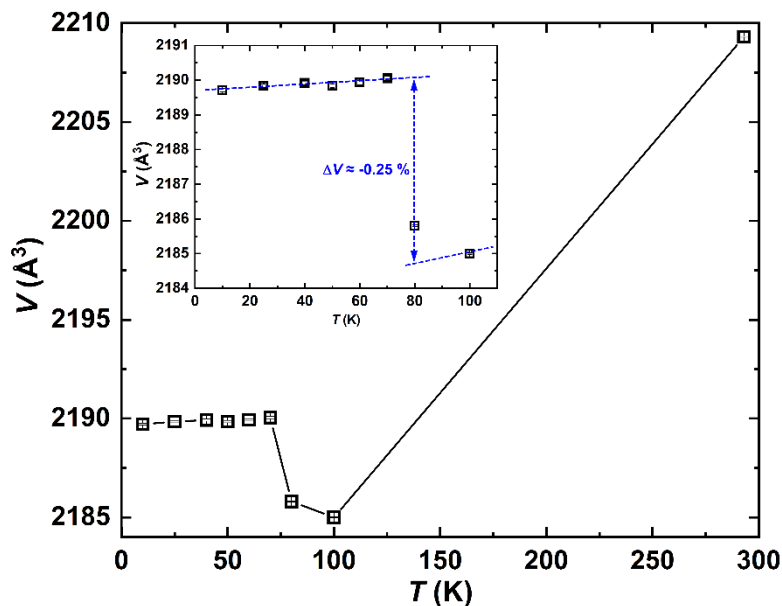

**Fig. S3.** Temperature dependence of the unit cell volume (UCV) of  $\text{Cu}_{11.95}\text{Ni}_{0.05}\text{Sb}_4\text{S}_{13}$ . UCV refined for the cubic modification of this compound (i.e., at 100 K and 293 K) were multiplied by a factor of 2 to make them comparable with those of the tetragonal structures. Solid line is guides for eyes only. Inset: temperature dependence of UCV in low temperature regime and near the structural phase transition. Estimation of the  $\Delta V \approx -0.25\%$  jump is tentative, due to the lack of the of the measured points above 100 K.

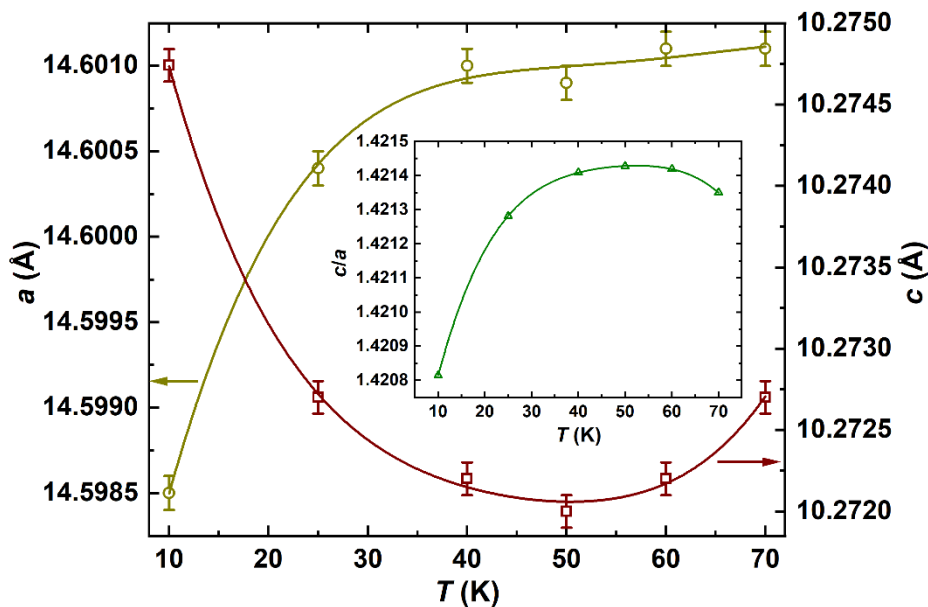

**Fig. S4.** Temperature dependence of the unit cell parameters (UCP) of  $\text{Cu}_{11.95}\text{Ni}_{0.05}\text{Sb}_4\text{S}_{13}$ . Inset: temperature dependence of the  $c/a$ -ratio of tetragonal  $\text{Cu}_{11.95}\text{Ni}_{0.05}\text{Sb}_4\text{S}_{13}$ . Solid lines are guides for eyes only.

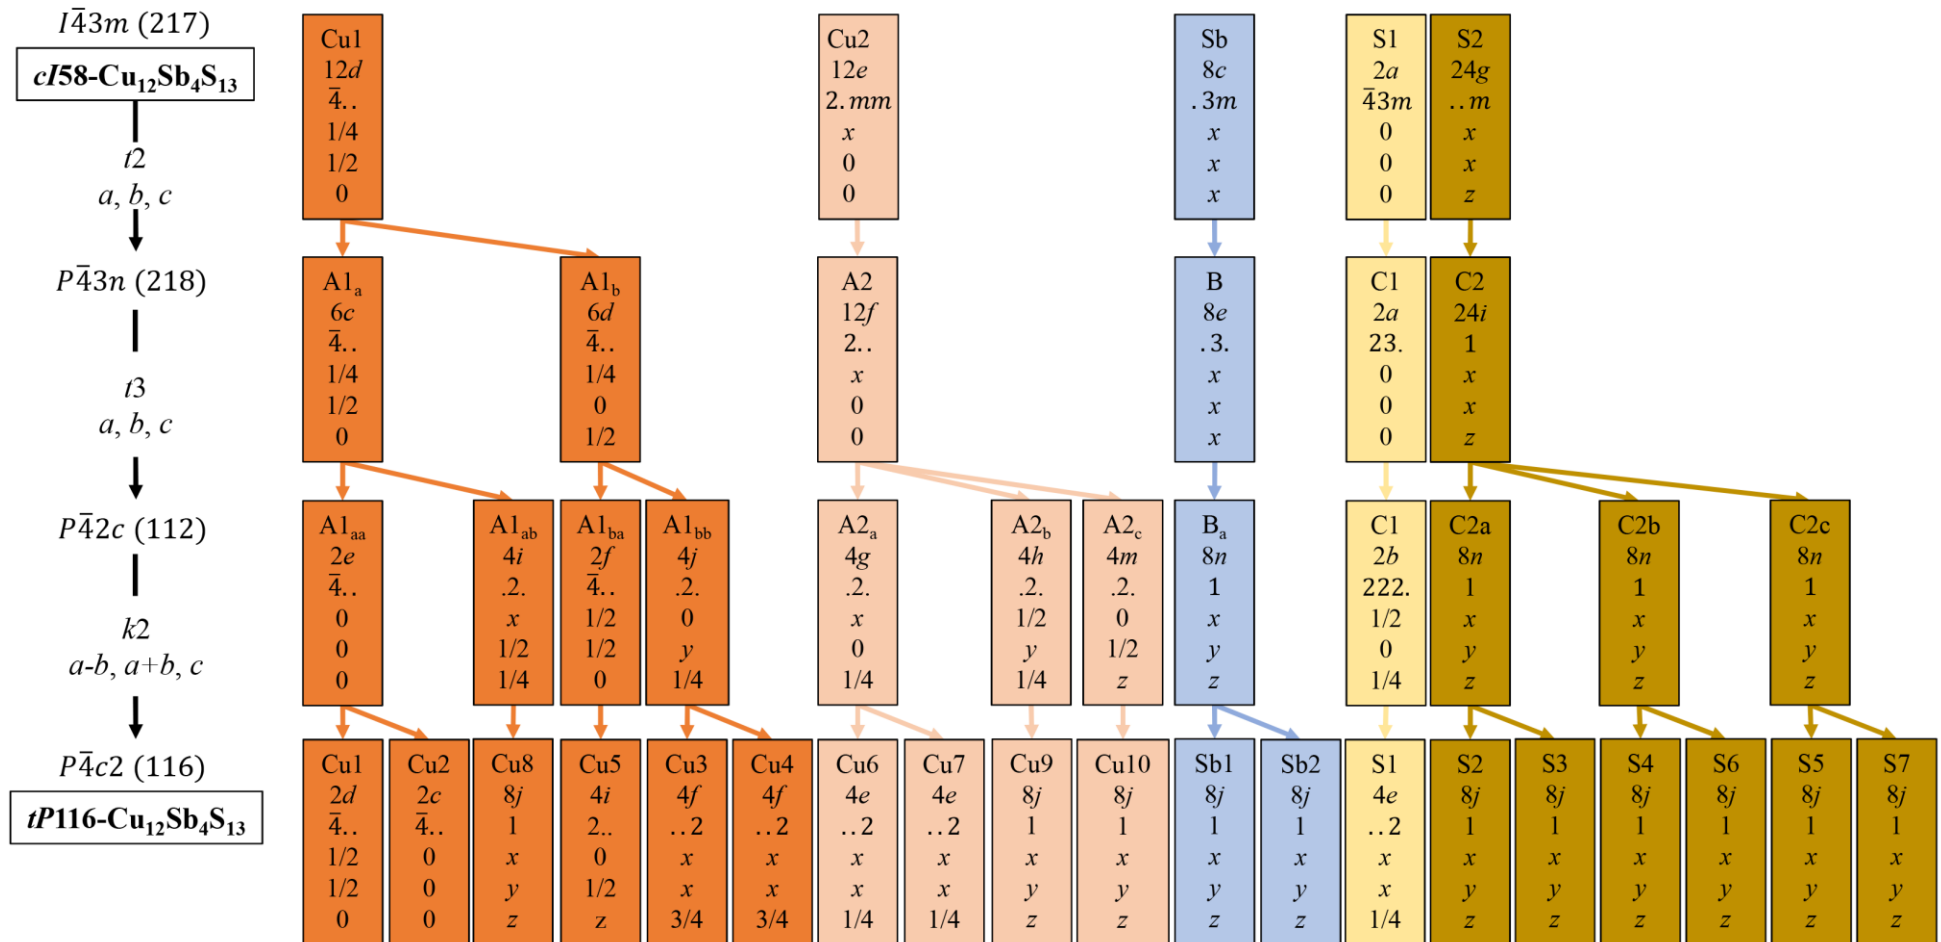

**Fig. S5.** Group-subgroup scheme of symmetry reduction operations needed to transform high temperature cubic ( $I\bar{4}3m$ )  $\text{Cu}_{12}\text{Sb}_4\text{S}_{13}$  tetrahedrite into its low temperature tetragonal ( $P\bar{4}c2$ ) modification. First two *translationsgleiche* ( $t$ ) transformations of indexes 2 and 3, respectively do not assume any changes in unit cell parameters whereas *klassengleiche* ( $k$ ) symmetry reduction of index 2 indicates  $a_{\text{tetr}} \approx a_{\text{cub}}\sqrt{2}$ ;  $c_{\text{tetr}} \approx a_{\text{cub}}$ .

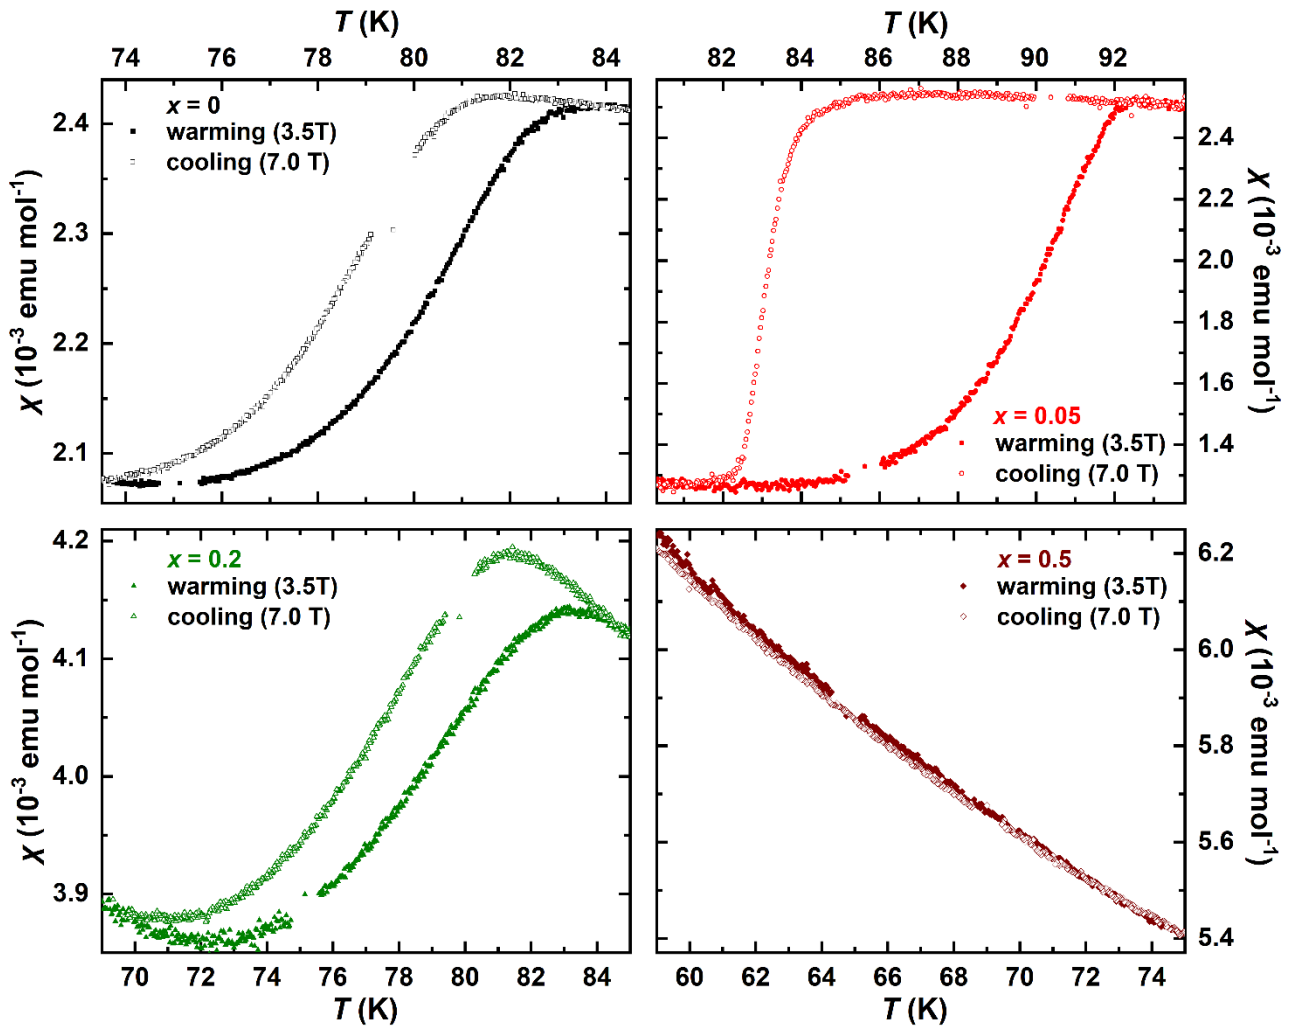

**Fig. S6.** Hystereses in the temperature dependencies of magnetic susceptibilities of  $\text{Cu}_{12-x}\text{Ni}_x\text{Sb}_4\text{S}_{13}$  compounds at the structural phase transitions.

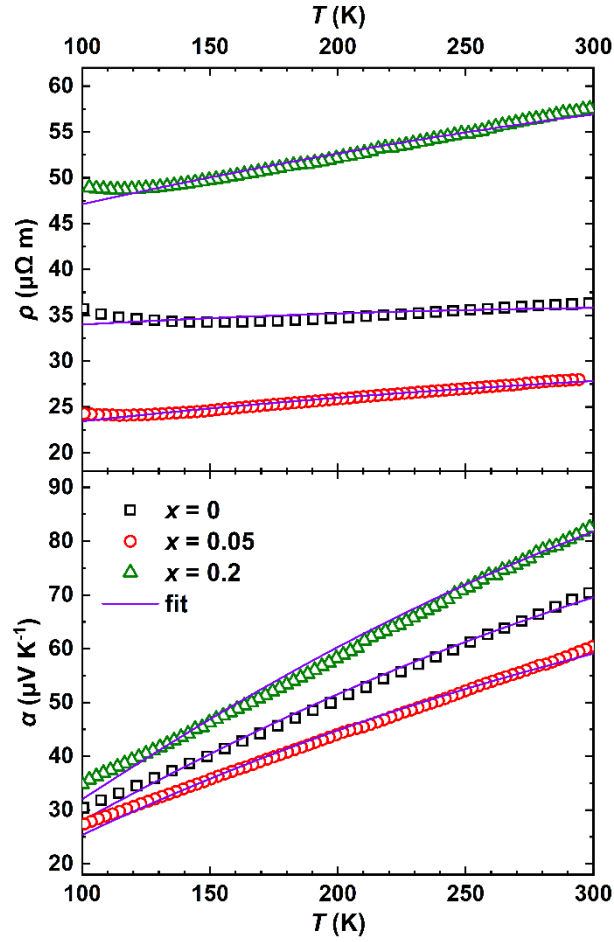

**Fig. S7.** Temperature dependencies of electrical resistivity [ $\rho(T)$ ] and Seebeck coefficient [ $\alpha(T)$ ] of  $\text{Cu}_{12-x}\text{Ni}_x\text{Sb}_4\text{S}_{13}$  together with the fits to a two-parabolic bands model for  $T > 100$  K performed by using *SeeBand* software

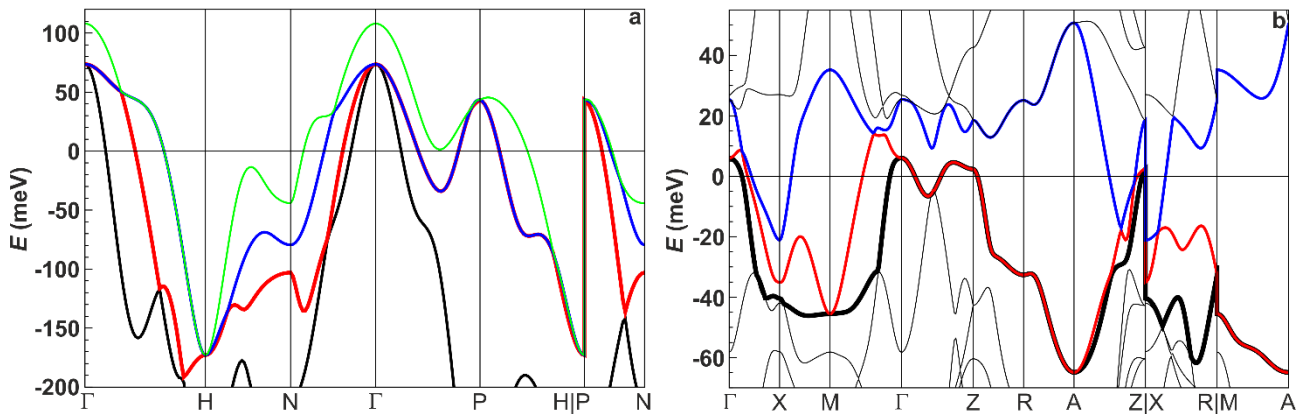

**Fig. S8.** Bands crossing the Fermi level ( $E_F = 0$  meV) in the electronic structure of cubic ( $I\bar{4}3m$ ) (a) and of tetragonal ( $P\bar{4}c2$ ) (b)  $\text{Cu}_{12}\text{Sb}_4\text{S}_{13}$ . The bands 249, 250, 251, 252 (a) are given in black, red, blue and green colors, respectively. The bands 1003, 1004, 1005 (b) are presented in black, red and blue, respectively.

**Table S1.** Crystallographic data for cubic (space group  $I\bar{4}3m$ )  $\text{Cu}_{12-x}\text{Ni}_x\text{Sb}_4\text{S}_{13}$  tetrahedrites refined from HR PXRD at different temperatures.

| Ni-content                                        | $x = 0$                                                   |             |             | $x = 0.05$                                                                    |             | $x = 0.2$                                                                   |             | $x = 0.5$                                                                   |             |             |
|---------------------------------------------------|-----------------------------------------------------------|-------------|-------------|-------------------------------------------------------------------------------|-------------|-----------------------------------------------------------------------------|-------------|-----------------------------------------------------------------------------|-------------|-------------|
| EDX composition                                   | $\text{Cu}_{12.0(1)}\text{Sb}_{4.1(1)}\text{S}_{12.9(1)}$ |             |             | $\text{Cu}_{12.0(1)}\text{Ni}_{0.03(10)}\text{Sb}_{4.1(1)}\text{S}_{12.7(1)}$ |             | $\text{Cu}_{11.9(1)}\text{Ni}_{0.2(1)}\text{Sb}_{4.1(1)}\text{S}_{12.8(1)}$ |             | $\text{Cu}_{11.5(1)}\text{Ni}_{0.5(1)}\text{Sb}_{4.1(1)}\text{S}_{12.7(1)}$ |             |             |
| $T$ , K                                           | 10 K                                                      | 100 K       | 293 K       | 100 K                                                                         | 293 K       | 100 K                                                                       | 293 K       | 10 K                                                                        | 100 K       | 293 K       |
| $a$ , Å                                           | 10.30679(3)                                               | 10.30422(3) | 10.32356(3) | 10.29929(3)                                                                   | 10.33731(5) | 10.29886(2)                                                                 | 10.32947(2) | 10.29754(4)                                                                 | 10.29974(2) | 10.32116(3) |
| $V$ , Å <sup>3</sup>                              | 1094.89(9)                                                | 1094.07(1)  | 1100.24(1)  | 1092.500(8)                                                                   | 1104.65(2)  | 1092.365(6)                                                                 | 1102.134(6) | 1091.95(2)                                                                  | 1092.646(7) | 1099.475(8) |
| $\rho$ , g cm <sup>-3</sup>                       | 5.05(1)                                                   | 5.0584(1)   | 5.0301(1)   | 5.0657(1)                                                                     | 5.0100(1)   | 5.0663(1)                                                                   | 5.0214(0)   | 5.0683(1)                                                                   | 5.0650(1)   | 5.0336(1)   |
| $2\theta_{\max}$ (°), $\sin\theta/\lambda_{\max}$ | 40, 0.964                                                 | 40, 0.964   | 40, 0.964   | 40, 0.964                                                                     | 40, 0.964   | 40, 0.964                                                                   | 40, 0.964   | 40, 0.964                                                                   | 40, 0.964   | 40, 0.964   |
| $N_{\text{reflections}}$                          | 443                                                       | 443         | 443         | 443                                                                           | 443         | 443                                                                         | 443         | 443                                                                         | 443         | 443         |
| $h_{\min}, k_{\min}, l_{\min}$                    | 0, 0, 1                                                   | 0, 0, 1     | 0, 0, 1     | 0, 0, 1                                                                       | 0, 0, 1     | 0, 0, 1                                                                     | 0, 0, 1     | 0, 0, 1                                                                     | 0, 0, 1     | 0, 0, 1     |
| $h_{\max}, k_{\max}, l_{\max}$                    | 11, 14, 20                                                | 11, 14, 20  | 11, 14, 20  | 11, 14, 20                                                                    | 11, 14, 20  | 11, 14, 20                                                                  | 11, 14, 20  | 11, 14, 20                                                                  | 11, 14, 20  | 11, 14, 20  |
| $N_{\text{free parameters}}$                      | 11                                                        | 11          | 11          | 11                                                                            | 11          | 11                                                                          | 11          | 11                                                                          | 11          | 11          |
| Residual peaks ( $e^- \text{Å}^{-3}$ )            | -0.63/1.37                                                | -0.44/0.56  | -0.41/0.71  | -0.45/0.67                                                                    | -0.53/0.76  | -0.43/0.67                                                                  | -0.56/0.78  | -0.42/0.68                                                                  | -0.38/0.60  | -0.32/0.40  |
| $R_I$                                             | 0.048                                                     | 0.0462      | 0.0431      | 0.0446                                                                        | 0.0328      | 0.0361                                                                      | 0.0351      | 0.0444                                                                      | 0.0428      | 0.0498      |
| $R_P$                                             | 0.036                                                     | 0.0322      | 0.0367      | 0.0409                                                                        | 0.0698      | 0.0323                                                                      | 0.0348      | 0.0660                                                                      | 0.0301      | 0.0402      |

**Table S2.** Crystallographic data for tetragonal (space group  $P\bar{4}2c$ )  $\text{Cu}_{12-x}\text{Ni}_x\text{Sb}_4\text{S}_{13}$  tetrahedrites refined from HR PXRD at different temperatures.

| $T$ , K                                           | $x = 0.05$   |              |              |              |              |              |              | $x = 0.2$    |
|---------------------------------------------------|--------------|--------------|--------------|--------------|--------------|--------------|--------------|--------------|
|                                                   | 10 K         | 25 K         | 40 K         | 50 K         | 60 K         | 70 K         | 80 K         | 10 K         |
| $a$ , Å                                           | 14.5985(1)   | 14.6004(1)   | 14.6010(1)   | 14.6009(1)   | 14.6011(1)   | 14.6011(1)   | 14.5757(3)   | 14.5897(2)   |
| $c$ , Å                                           | 10.27474(9)  | 10.2727(1)   | 10.2722(1)   | 10.2720(1)   | 10.2722(1)   | 10.2727(1)   | 10.2886(3)   | 10.2819(2)   |
| $V$ , Å <sup>3</sup>                              | 2189.71(5)   | 2189.84(6)   | 2189.92(6)   | 2189.84(6)   | 2189.93(6)   | 2190.05(6)   | 2185.8(2)    | 2188.60      |
| $\rho$ , g cm <sup>-3</sup>                       | 5.0548(1)    | 5.0538(2)    | 5.0536(2)    | 5.0545(2)    | 5.0543(2)    | 5.0540(2)    | 5.06(3)      | 5.0574(2)    |
| $2\theta_{\max}$ (°), $\sin\theta/\lambda_{\max}$ | 40.00, 0.964 | 29.99, 0.730 | 29.99, 0.730 | 29.99, 0.730 | 29.99, 0.730 | 29.99, 0.730 | 29.99, 0.730 | 40.00, 0.964 |
| $N_{\text{reflections}}$                          | 4430         | 1967         | 1968         | 1968         | 1967         | 1968         | 1960         | 4428         |
| $h_{\min}, k_{\min}, l_{\min}$                    | 0, 0, 0      | 0, 0, 0      | 0, 0, 0      | 0, 0, 0      | 0, 0, 0      | 0, 0, 0      | 0, 0, 0      | 0, 0, 0      |
| $h_{\max}, k_{\max}, l_{\max}$                    | 20, 28, 20   | 20, 28, 20   | 15, 22, 15   | 15, 22, 15   | 15, 22, 15   | 15, 22, 15   | 15, 22, 15   | 20, 28, 20   |
| $N_{\text{free parameters}}$                      | 59           | 59           | 59           | 59           | 59           | 59           | 59           | 59           |
| Residual peaks ( $e^- \text{Å}^{-3}$ )            | -0.76/0.99   | -0.56/0.79   | -0.41/0.57   | -0.40/0.51   | -0.47/0.61   | -0.57/0.75   | -0.59/0.81   | -0.81/1.32   |
| $R_I$                                             | 0.0524       | 0.0435       | 0.0399       | 0.0423       | 0.0522       | 0.0538       | 0.083        | 0.0421       |
| $R_P$                                             | 0.0649       | 0.0715       | 0.0715       | 0.0670       | 0.0679       | 0.0643       | 0.062        | 0.1025       |

**Table S3.** Atomic coordinates, thermal displacement ( $B_{\text{iso}}$ ) and occupational ( $G$ ) parameters as well as interatomic distances ( $d$ ) for cubic (space group  $I\bar{4}3m$ )  $\text{Cu}_{12-x}\text{Ni}_x\text{Sb}_4\text{S}_{13}$  tetrahedrites refined from HR PXRD at different temperatures.\*

| Atom | Site                | $T$                          | $x = 0$    |            |            | $x = 0.05$ |            | $x = 0.2$  |            | $x = 0.5$  |            |            |
|------|---------------------|------------------------------|------------|------------|------------|------------|------------|------------|------------|------------|------------|------------|
|      |                     |                              | 10 K       | 100 K      | 293 K      | 100 K      | 293 K      | 100 K      | 293 K      | 10 K       | 100 K      | 293 K      |
| Cu1  | 12d,<br>(1/4 1/2 0) | $B_{\text{iso}}, \text{\AA}$ | 0.965(8)   | 0.805(8)   | 1.65(1)    | 0.632(7)   | 1.91(1)    | 0.590(8)   | 1.731(8)   | 0.81(1)    | 0.645(8)   | 1.792(10)  |
|      |                     | -4S2                         | 2.3035(5)  | 2.3044(5)  | 2.3076(5)  | 2.3034(5)  | 2.3218(6)  | 2.3028(5)  | 2.3174(4)  | 2.2991(7)  | 2.3019(5)  | 2.3126(5)  |
|      |                     | -4Sb                         | 3.6562(2)  | 3.6588(2)  | 3.6650(2)  | 3.6574(2)  | 3.6694(2)  | 3.6574(2)  | 3.6669(2)  | 3.6552(2)  | 3.6579(2)  | 3.6644(2)  |
| Cu2  | 24g ( $x x z$ )     | $x$                          | 0.0026(5)  | 0.01801(5) | 0.02037(5) | 0.01702(5) | 0.02068(6) | 0.01691(5) | 0.02033(4) | 0.0122(1)  | 0.01720(5) | 0.02034(5) |
|      |                     | $z$                          | 0.78388(5) | 0.78192(5) | 0.78163(5) | 0.78171(5) | 0.78306(5) | 0.78186(5) | 0.78273(4) | 0.78298(7) | 0.78176(5) | 0.78233(5) |
|      |                     | $B_{\text{iso}}, \text{\AA}$ | 4.30(2)    | 1.82(2)    | 2.40(2)    | 1.54(1)    | 2.89(2)    | 1.52(2)    | 2.66(2)    | 2.89(3)    | 1.45(2)    | 2.69(2)    |
|      |                     | $G$                          | 0.50(1)    | 0.50(1)    | 0.50(1)    | 0.50(1)    | 0.50(1)    | 0.50(1)    | 0.50(1)    | 0.50(1)    | 0.50(1)    | 0.50(1)    |
|      |                     | -1Cu2                        | 0.075(7)   | 0.5247(8)  | 0.5946(8)  | 0.4955(8)  | 0.6045(8)  | 0.4923(8)  | 0.5937(6)  | 0.355(2)   | 0.5009(8)  | 0.5937(7)  |
|      |                     | -1S1                         | 2.2279(5)  | 2.2625(5)  | 2.2739(6)  | 2.2619(5)  | 2.2630(6)  | 2.2600(5)  | 2.2640(5)  | 2.2420(7)  | 2.2617(6)  | 2.2662(5)  |
|      |                     | -2S2                         | 2.262(4)   | 2.2734(7)  | 2.2763(8)  | 2.2688(7)  | 2.2750(8)  | 2.2698(7)  | 2.2759(6)  | 2.271(1)   | 2.2734(8)  | 2.2781(7)  |
|      |                     | -2Cu2                        | 3.113(5)   | 2.9156(7)  | 2.8909(8)  | 2.9318(7)  | 2.8693(8)  | 2.9310(8)  | 2.8773(6)  | 2.983(2)   | 2.9285(8)  | 2.8803(7)  |
|      |                     | -1Sb                         | 3.367(5)   | 3.1069(6)  | 3.0841(6)  | 3.1169(6)  | 3.0909(6)  | 3.1168(6)  | 3.0897(5)  | 3.203(1)   | 3.1110(6)  | 3.0819(6)  |
| Sb   | 8c ( $x x x$ )      | $x$                          | 0.26674(2) | 0.26899(1) | 0.26860(2) | 0.26918(1) | 0.26817(2) | 0.26929(2) | 0.26842(1) | 0.26810(2) | 0.26941(2) | 0.26874(1) |
|      |                     | $B_{\text{iso}}, \text{\AA}$ | 0.954(4)   | 0.774(3)   | 1.279(4)   | 0.554(3)   | 1.472(4)   | 0.536(3)   | 1.308(3)   | 0.740(4)   | 0.587(3)   | 1.343(4)   |
|      |                     | -3S2                         | 2.4342(5)  | 2.4352(5)  | 2.4438(5)  | 2.4365(5)  | 2.4399(6)  | 2.4380(5)  | 2.4382(4)  | 2.4352(7)  | 2.4368(5)  | 2.4358(5)  |
| S1   | 2a (0 0 0)          | $B_{\text{iso}}, \text{\AA}$ | 4.36(7)    | 1.61(4)    | 1.66(5)    | 1.27(4)    | 1.73(5)    | 1.34(4)    | 1.92(4)    | 3.09(8)    | 1.17(4)    | 2.01(5)    |
|      |                     | -12Cu2                       | 2.2279(5)  | 2.2625(5)  | 2.2739(6)  | 2.2619(5)  | 2.2630(6)  | 2.2600(5)  | 2.2640(5)  | 2.2420(7)  | 2.2617(6)  | 2.2662(5)  |
| S2   | 24g ( $x x z$ )     | $x$                          | 0.11458(4) | 0.11586(4) | 0.11537(5) | 0.11581(4) | 0.11508(5) | 0.11579(4) | 0.11536(4) | 0.11536(6) | 0.11603(4) | 0.11574(4) |
|      |                     | $z$                          | 0.36406(6) | 0.36363(5) | 0.36388(6) | 0.36363(5) | 0.36217(6) | 0.36370(5) | 0.36254(5) | 0.36434(8) | 0.36386(6) | 0.36295(5) |
|      |                     | $B_{\text{iso}}, \text{\AA}$ | 0.920 (10) | 0.621(8)   | 1.00(1)    | 0.466(8)   | 1.30(1)    | 0.469(8)   | 1.178(8)   | 0.69(1)    | 0.511(8)   | 1.203(9)   |
|      |                     | -2Cu2                        | 2.262(4)   | 2.2734(7)  | 2.2763(8)  | 2.2688(7)  | 2.2750(8)  | 2.2698(7)  | 2.2759(6)  | 2.271(1)   | 2.2734(8)  | 2.2781(7)  |
|      |                     | -2Cu1                        | 2.3035(5)  | 2.3044(5)  | 2.3076(5)  | 2.3034(5)  | 2.3218(6)  | 2.3028(5)  | 2.3174(4)  | 2.2991(7)  | 2.3019(5)  | 2.3126(5)  |
|      |                     | -1S2                         | 3.3399(7)  | 3.3767(6)  | 3.3684(7)  | 3.3736(6)  | 3.3649(7)  | 3.3729(6)  | 3.3704(5)  | 3.3602(9)  | 3.3802(7)  | 3.3785(6)  |

\* - Ni-content  $x$  cannot be refined from this data due to the small difference (i.e.  $1e^-$ ) in the electronic density between Ni and Cu. Hence, Ni can occupy any of the Cu-atom sites.

**Table S4.** Atomic coordinates and thermal displacement ( $B_{\text{iso}}$ ) for tetragonal (space group  $P\bar{4}2c$ )  $\text{Cu}_{12-x}\text{Ni}_x\text{Sb}_4\text{S}_{13}$  tetrahedrites refined from HR PXRD at different temperatures. \*

| Atom Site |                 |                                | $x = 0.05$ |            |            |            |            |            |            | $x = 0.2$  |
|-----------|-----------------|--------------------------------|------------|------------|------------|------------|------------|------------|------------|------------|
| 1         | 2               | 3                              | 4          | 5          | 6          | 7          | 8          | 9          | 10         | 11         |
|           |                 | $T$                            | 10 K       | 25 K       | 40 K       | 50 K       | 60 K       | 70 K       | 80 K       | 10 K       |
| Cu1       | 2d, (1/2 1/2 0) | $B_{\text{iso}}, \text{\AA}^2$ | 0.44(8)    | 0.847(6)   | 0.782(6)   | 0.76(3)    | 0.70(3)    | 0.66(3)    | 0.64(3)    | 0.60(15)   |
| Cu2       | 2c, (0 0 0)     | $B_{\text{iso}}, \text{\AA}^2$ | 0.46(7)    | 0.880(6)   | 0.844(6)   | 0.83(3)    | 0.81(3)    | 0.80(3)    | 0.75(3)    | 0.6(2)     |
| Cu3       | 4f, (x, x, 3/4) | $x$                            | 0.1376(6)  | 0.1376(2)  | 0.1376(2)  | 0.1380(7)  | 0.1383(7)  | 0.1385(7)  | 0.1376(10) | 0.1348(6)  |
|           |                 | $B_{\text{iso}}, \text{\AA}^2$ | 0.39(5)    | 0.756(6)   | 0.676(6)   | 0.64(3)    | 0.58(3)    | 0.53(3)    | 0.47(3)    | 0.57(10)   |
| Cu4       | 4f, (x, x, 3/4) | $x$                            | 0.3808(6)  | 0.3796(2)  | 0.3796(2)  | 0.3796(7)  | 0.3799(7)  | 0.3798(8)  | 0.3754(12) | 0.3780(7)  |
|           |                 | $B_{\text{iso}}, \text{\AA}^2$ | 0.25(5)    | 0.712(6)   | 0.625(6)   | 0.59(3)    | 0.52(3)    | 0.48(3)    | 0.44(3)    | 0.46(10)   |
| Cu5       | 4i, (0, 1/2, z) | $z$                            | 0.0274(12) | 0.0245(4)  | 0.0258(4)  | 0.026(2)   | 0.026(2)   | 0.026(2)   | 0.016(3)   | 0.0188(15) |
|           |                 | $B_{\text{iso}}, \text{\AA}^2$ | 0.63(6)    | 0.783(6)   | 0.703(6)   | 0.67(3)    | 0.62(3)    | 0.57(3)    | 0.55(3)    | 0.77(13)   |
| Cu6       | 4e, (x, x, 1/4) | $x$                            | 0.3525(6)  | 0.3522(2)  | 0.3513(2)  | 0.3524(7)  | 0.3522(7)  | 0.3520(7)  | 0.3561(11) | 0.3547(6)  |
|           |                 | $B_{\text{iso}}, \text{\AA}^2$ | 1.82(6)    | 0.919(6)   | 0.990(6)   | 1.02(3)    | 1.09(3)    | 1.14(3)    | 1.20(3)    | 0.95(9)    |
| Cu7       | 4e, (x, x, 1/4) | $x$                            | 0.1263(6)  | 0.1265(2)  | 0.1257(2)  | 0.1262(7)  | 0.1264(7)  | 0.1265(7)  | 0.1308(9)  | 0.1284(6)  |
|           |                 | $B_{\text{iso}}, \text{\AA}^2$ | 0.97(5)    | 0.866(6)   | 0.830(6)   | 0.82(3)    | 0.81(3)    | 0.81(3)    | 0.91(3)    | 0.75(8)    |
| Cu8       | 8j, (x, y, z)   | $x$                            | 0.6257(7)  | 0.6248(2)  | 0.6247(2)  | 0.6247(8)  | 0.6252(8)  | 0.6249(8)  | 0.6262(11) | 0.6246(7)  |
|           |                 | $y$                            | 0.1223(6)  | 0.1215(2)  | 0.1214(2)  | 0.1214(7)  | 0.1213(7)  | 0.1210(7)  | 0.1246(12) | 0.1241(7)  |
|           |                 | $z$                            | 0.2403(9)  | 0.2401(3)  | 0.2400(3)  | 0.2396(11) | 0.2393(11) | 0.2387(11) | 0.245(2)   | 0.2432(10) |
|           |                 | $B_{\text{iso}}, \text{\AA}^2$ | 0.61(4)    | 0.617(6)   | 0.512(6)   | 0.47(3)    | 0.39(3)    | 0.31(3)    | 0.24(3)    | 0.59(7)    |
| Cu9       | 8j, (x, y, z)   | $x$                            | 0.3613(5)  | 0.3621(2)  | 0.3615(2)  | 0.3615(7)  | 0.3611(7)  | 0.3603(7)  | 0.3550(10) | 0.3592(6)  |
|           |                 | $y$                            | 0.1512(6)  | 0.1508(2)  | 0.1502(2)  | 0.1501(7)  | 0.1494(7)  | 0.1496(7)  | 0.1425(10) | 0.1521(6)  |
|           |                 | $z$                            | 0.2178(7)  | 0.2162(2)  | 0.2164(2)  | 0.2168(8)  | 0.2168(9)  | 0.2170(9)  | 0.2273(14) | 0.2223(8)  |
|           |                 | $B_{\text{iso}}, \text{\AA}^2$ | 1.02(4)    | 0.988(6)   | 0.976(6)   | 0.97(3)    | 0.99(3)    | 0.99(3)    | 1.13(3)    | 0.88(7)    |
| Cu10      | 8j, (x, y, z)   | $x$                            | 0.2721(5)  | 0.2718(1)  | 0.2720(1)  | 0.2717(6)  | 0.2718(6)  | 0.2713(6)  | 0.2637(10) | 0.2694(5)  |
|           |                 | $y$                            | 0.2510(6)  | 0.2496(2)  | 0.2501(2)  | 0.2506(7)  | 0.2509(7)  | 0.2513(7)  | 0.2630(11) | 0.2522(6)  |
|           |                 | $z$                            | 0.0417(6)  | 0.0420(2)  | 0.0413(2)  | 0.0414(8)  | 0.0413(8)  | 0.0415(8)  | 0.039(2)   | 0.0428(7)  |
|           |                 | $B_{\text{iso}}, \text{\AA}^2$ | 0.93(4)    | 0.974(6)   | 0.954(6)   | 0.95(3)    | 0.95(3)    | 0.93(3)    | 1.07(3)    | 0.73(6)    |
| Sb1       | 8j, (x, y, z)   | $x$                            | 0.2536(4)  | 0.2538(1)  | 0.2532(1)  | 0.2531(5)  | 0.2526(5)  | 0.2521(4)  | 0.2485(6)  | 0.2514(4)  |
|           |                 | $y$                            | 0.4776(2)  | 0.47732(6) | 0.47735(6) | 0.4770(3)  | 0.4771(3)  | 0.4768(3)  | 0.4793(6)  | 0.4787(3)  |
|           |                 | $z$                            | 0.0235(4)  | 0.0242(1)  | 0.0244(1)  | 0.0244(5)  | 0.0244(5)  | 0.0242(5)  | 0.0221(9)  | 0.0219(4)  |
|           |                 | $B_{\text{iso}}, \text{\AA}^2$ | 0.70(2)    | 0.573(5)   | 0.509(5)   | 0.49(2)    | 0.45(2)    | 0.40(2)    | 0.46(3)    | 0.47(3)    |
| Sb2       | 8j, (x, y, z)   | $x$                            | 0.2556(4)  | 0.2562(1)  | 0.2563(1)  | 0.2563(4)  | 0.2568(4)  | 0.2570(4)  | 0.2531(6)  | 0.2548(4)  |
|           |                 | $y$                            | 0.0073(2)  | 0.00709(6) | 0.00723(6) | 0.0071(3)  | 0.0071(3)  | 0.0071(3)  | 0.0136(5)  | 0.0093(2)  |
|           |                 | $z$                            | 0.0083(4)  | 0.0079(1)  | 0.0081(1)  | 0.0083(4)  | 0.0084(4)  | 0.0088(4)  | 0.0173(8)  | 0.0114(4)  |

Continuation of **Table S4**

| 1   | 2                | 3                              | 4          | 5         | 6         | 7          | 8          | 9          | 10         | 11         |
|-----|------------------|--------------------------------|------------|-----------|-----------|------------|------------|------------|------------|------------|
|     |                  |                                | 10 K       | 25 K      | 40 K      | 50 K       | 60 K       | 70 K       | 80 K       | 10 K       |
| Sb2 |                  | $B_{\text{iso}}, \text{\AA}^2$ | 0.76(2)    | 0.513(5)  | 0.422(5)  | 0.39(2)    | 0.37(2)    | 0.34(2)    | 0.47(3)    | 0.47(3)    |
| S1  | 4e, (x, x, 1/4)  | x                              | 0.2329(8)  | 0.2326(2) | 0.2333(2) | 0.2331(9)  | 0.2337(9)  | 0.2345(9)  | 0.2423(14) | 0.2341(7)  |
|     |                  | $B_{\text{iso}}, \text{\AA}^2$ | 1.08(9)    | 0.972(6)  | 0.955(6)  | 0.95(3)    | 0.92(3)    | 0.90(3)    | 0.87(3)    | 0.87(15)   |
| S2  | 8j, (x, y, z)    | x                              | 0.2508(14) | 0.2502(4) | 0.2509(4) | 0.250(2)   | 0.250(2)   | 0.250(2)   | 0.251(3)   | 0.251(2)   |
|     |                  | y                              | 0.1479(11) | 0.1472(3) | 0.1483(3) | 0.1470(14) | 0.1470(14) | 0.1474(14) | 0.146(2)   | 0.1444(13) |
|     |                  | z                              | 0.5973(13) | 0.5987(4) | 0.5985(4) | 0.599(2)   | 0.599(2)   | 0.600(2)   | 0.601(3)   | 0.6017(14) |
|     |                  | $B_{\text{iso}}, \text{\AA}^2$ | 0.45(7)    | 0.845(6)  | 0.780(6)  | 0.75(3)    | 0.69(3)    | 0.65(3)    | 0.54(3)    | 0.56(13)   |
| S3  | 8j, (x, y, z)    | x                              | 0.251(2)   | 0.2505(5) | 0.2510(5) | 0.252(2)   | 0.251(2)   | 0.252(2)   | 0.252(3)   | 0.251(2)   |
|     |                  | y                              | 0.6282(11) | 0.6284(3) | 0.6284(4) | 0.6282(14) | 0.6285(14) | 0.6280(15) | 0.629(3)   | 0.6296(13) |
|     |                  | z                              | 0.1229(14) | 0.1218(4) | 0.1217(4) | 0.122(2)   | 0.122(2)   | 0.122(2)   | 0.116(3)   | 0.119(2)   |
|     |                  | $B_{\text{iso}}, \text{\AA}$   | 0.44(6)    | 0.790(6)  | 0.708(6)  | 0.67(3)    | 0.59(3)    | 0.53(3)    | 0.44(3)    | 0.47(12)   |
| S4  | 8j, (x, y, z)    | x                              | 0.0162(13) | 0.0162(4) | 0.0171(4) | 0.016(2)   | 0.016(2)   | 0.017(2)   | 0.010(3)   | 0.0177(14) |
|     |                  | y                              | 0.3720(14) | 0.3719(4) | 0.3719(4) | 0.372(2)   | 0.372(2)   | 0.372(2)   | 0.373(3)   | 0.3718(15) |
|     |                  | z                              | 0.153(2)   | 0.1526(6) | 0.1529(6) | 0.153(3)   | 0.153(2)   | 0.153(2)   | 0.140(4)   | 0.153(2)   |
|     |                  | $B_{\text{iso}}, \text{\AA}$   | 0.55(9)    | 0.851(6)  | 0.785(6)  | 0.76(3)    | 0.70(3)    | 0.65(3)    | 0.55(3)    | 0.53(14)   |
| S5  | 8j, (x, y, z)    | x                              | 0.0009(11) | 0.0013(3) | 0.0021(3) | 0.0011(13) | 0.0009(13) | 0.0008(14) | 0.007(2)   | 0.0051(12) |
|     |                  | y                              | 0.123(2)   | 0.1226(5) | 0.1241(5) | 0.123(2)   | 0.123(2)   | 0.124(2)   | 0.122(3)   | 0.120(2)   |
|     |                  | z                              | 0.138(2)   | 0.1370(6) | 0.1376(6) | 0.138(3)   | 0.138(3)   | 0.139(3)   | 0.140(4)   | 0.132(3)   |
|     |                  | $B_{\text{iso}}, \text{\AA}$   | 0.82(9)    | 0.876(6)  | 0.824(6)  | 0.80(3)    | 0.75(3)    | 0.71(3)    | 0.63(3)    | 0.67(14)   |
| S6  | 8j,<br>(x, y, z) | x                              | 0.4850(11) | 0.4849(3) | 0.4866(3) | 0.4851(14) | 0.4844(14) | 0.4847(14) | 0.489(2)   | 0.4863(13) |
|     |                  | y                              | 0.3720(15) | 0.3725(5) | 0.3741(5) | 0.373(2)   | 0.373(2)   | 0.372(2)   | 0.373(3)   | 0.374(2)   |
|     |                  | z                              | 0.133(2)   | 0.1337(6) | 0.1339(6) | 0.134(3)   | 0.134(3)   | 0.134(3)   | 0.130(5)   | 0.131(3)   |
|     |                  | $B_{\text{iso}}, \text{\AA}$   | 0.39(7)    | 0.833(6)  | 0.774(6)  | 0.75(3)    | 0.70(3)    | 0.66(3)    | 0.60(3)    | 0.59(14)   |
| S7  | 8j,<br>(x, y, z) | x                              | 0.4940(11) | 0.4941(3) | 0.4945(3) | 0.4943(14) | 0.4949(14) | 0.4954(14) | 0.494(2)   | 0.4900(14) |
|     |                  | y                              | 0.1245(15) | 0.1251(5) | 0.1255(5) | 0.125(2)   | 0.125(2)   | 0.126(2)   | 0.125(3)   | 0.124(2)   |
|     |                  | z                              | 0.119(2)   | 0.1177(5) | 0.1173(5) | 0.118(2)   | 0.119(2)   | 0.120(2)   | 0.130(4)   | 0.126(2)   |
|     |                  | $B_{\text{iso}}, \text{\AA}$   | 0.52(8)    | 0.825(6)  | 0.746(6)  | 0.71(3)    | 0.64(3)    | 0.58(3)    | 0.50(3)    | 0.7(2)     |

\* - Ni-content  $x$  cannot be refined from this data due to the small difference (i.e.  $1e^-$ ) in the electronic density between Ni and Cu. Hence, Ni can occupy any of the Cu-atom sites.

**Table S5.** Interatomic distances ( $d$ ) in tetragonal (space group  $P\bar{4}2c$ )  $\text{Cu}_{12-x}\text{Ni}_x\text{Sb}_4\text{S}_{13}$  tetrahedrites

|      |        |    | $x = 0.05$ |          |          |          |          |          |          | $x = 0.2$ |
|------|--------|----|------------|----------|----------|----------|----------|----------|----------|-----------|
| 1    | 2      | 3  | 4          | 5        | 6        | 7        | 8        | 9        | 10       | 11        |
| Atom | Site   | CN | 10 K       | 25 K     | 40 K     | 50 K     | 60 K     | 70 K     | 80 K     | 10 K      |
| Cu1  | -4S6   | 4  | 2.323(5)   | 2.325(6) | 2.304(6) | 2.325(6) | 2.324(6) | 2.312(6) | 2.29(4)  | 2.29(2)   |
|      | -4Cu4  |    | 3.555(1)   | 3.561(2) | 3.574(2) | 3.564(2) | 3.563(2) | 3.558(2) | 3.662(5) | 3.598(7)  |
|      | -4Sb1  |    | 3.621(1)   | 3.624(2) | 3.627(2) | 3.629(2) | 3.637(2) | 3.647(2) | 3.686(8) | 3.647(6)  |
| Cu2  | -4S5   | 4  | 2.286(5)   | 2.287(6) | 2.298(6) | 2.294(6) | 2.296(6) | 2.322(6) | 2.29(4)  | 2.22(2)   |
|      | -4Sb2  |    | 3.738(1)   | 3.742(4) | 3.745(2) | 3.740(2) | 3.750(1) | 3.752(1) | 3.699(8) | 3.722(5)  |
| Cu3  | -2S2   | 4  | 2.273(4)   | 2.270(5) | 2.276(6) | 2.274(5) | 2.262(5) | 2.268(5) | 2.26(4)  | 2.28(2)   |
|      | -2S5   |    | 2.342(4)   | 2.345(5) | 2.351(5) | 2.329(5) | 2.339(5) | 2.308(5) | 2.40(4)  | 2.38(2)   |
|      | -2Cu8  |    | 3.458(3)   | 3.462(4) | 3.480(4) | 3.462(3) | 3.456(3) | 3.465(4) | 3.45(2)  | 3.52(2)   |
|      | -2Sb2  |    | 3.692(2)   | 3.694(2) | 3.695(2) | 3.691(2) | 3.696(2) | 3.694(2) | 3.66(2)  | 3.674(8)  |
| Cu4  | -2Sb2  | 4  | 3.693(2)   | 3.695(2) | 3.696(2) | 3.696(2) | 3.701(2) | 3.705(2) | 3.70(2)  | 3.694(7)  |
|      | -2S6   |    | 2.292(4)   | 2.316(5) | 2.290(6) | 2.290(6) | 2.322(5) | 2.306(6) | 2.33(4)  | 2.33(2)   |
|      | -2S3   |    | 2.318(5)   | 2.307(6) | 2.297(6) | 2.309(5) | 2.296(6) | 2.270(6) | 2.27(4)  | 2.29(2)   |
| Cu5  | -2Cu1  | 4  | 3.555(1)   | 3.561(2) | 3.574(2) | 3.564(2) | 3.563(2) | 3.558(2) | 3.662(2) | 3.598(7)  |
|      | -2S4   |    | 2.279(5)   | 2.291(6) | 2.295(6) | 2.292(6) | 2.294(6) | 2.297(6) | 2.25(4)  | 2.34(2)   |
|      | -2S7   |    | 2.357(5)   | 2.352(6) | 2.350(7) | 2.361(6) | 2.359(6) | 2.393(7) | 2.37(4)  | 2.34(3)   |
| Cu6  | -2Cu8  | 3  | 3.506(3)   | 3.393(4) | 3.499(4) | 3.494(3) | 3.498(4) | 3.499(4) | 3.57(2)  | 3.55(2)   |
|      | -2S6   |    | 2.299(4)   | 2.279(6) | 2.331(6) | 2.284(5) | 2.280(5) | 2.290(6) | 2.31(4)  | 2.29(2)   |
|      | -1S1   |    | 2.472(3)   | 2.482(4) | 2.438(4) | 2.481(3) | 2.461(4) | 2.444(4) | 2.34(3)  | 2.49(2)   |
|      | -2Cu10 |    | 2.857(2)   | 2.863(3) | 2.850(3) | 2.867(3) | 2.865(3) | 2.862(3) | 2.89(2)  | 2.88(2)   |
| Cu7  | -2Cu9  | 3  | 2.962(3)   | 2.963(3) | 2.961(3) | 2.973(3) | 2.977(4) | 2.979(4) | 3.12(2)  | 2.97(2)   |
|      | -2Sb1  |    | 3.291(2)   | 3.289(2) | 3.287(2) | 3.290(2) | 3.292(2) | 3.296(2) | 3.34(2)  | 3.323(8)  |
|      | -2S5   |    | 2.159(4)   | 2.172(5) | 2.142(5) | 2.176(5) | 2.171(5) | 2.175(5) | 2.14(4)  | 2.17(2)   |
| Cu8  | -1S1   | 4  | 2.197(3)   | 2.180(4) | 2.222(4) | 2.181(3) | 2.199(4) | 2.213(4) | 2.30(2)  | 2.18(2)   |
|      | -2Sb2  |    | 3.572(2)   | 3.577(2) | 3.578(2) | 3.572(2) | 3.579(2) | 3.579(2) | 3.44(2)  | 3.527(7)  |
|      | -1S7   |    | 2.291(4)   | 2.294(5) | 2.282(6) | 2.292(5) | 2.277(5) | 2.249(6) | 2.26(4)  | 2.30(2)   |
|      | -1S4   |    | 2.313(5)   | 2.293(6) | 2.303(6) | 2.289(5) | 2.295(6) | 2.324(6) | 2.30(4)  | 2.33(2)   |
| Cu9  | -1S2   | 3  | 2.341(5)   | 2.360(6) | 2.359(6) | 2.355(5) | 2.342(6) | 2.349(6) | 2.34(4)  | 2.35(2)   |
|      | -1S3   |    | 2.350(5)   | 2.360(6) | 2.366(6) | 2.358(6) | 2.375(6) | 2.406(6) | 2.34(4)  | 2.33(2)   |
|      | -1S7   |    | 2.234(4)   | 2.235(5) | 2.223(5) | 2.226(5) | 2.247(5) | 2.264(6) | 2.27(4)  | 2.19(2)   |
|      | -1S1   |    | 2.247(3)   | 2.245(4) | 2.257(4) | 2.245(3) | 2.244(3) | 2.230(2) | 2.21(2)  | 2.20(2)   |
|      | -1S4   |    | 2.367(5)   | 2.374(6) | 2.368(6) | 2.365(5) | 2.339(6) | 2.315(6) | 2.38(4)  | 2.35(2)   |
| Cu10 | -1Cu10 | 3  | 2.663(3)   | 2.650(3) | 2.659(3) | 2.670(3) | 2.680(3) | 2.696(3) | 2.93(2)  | 2.70(2)   |
|      | -1Cu6  |    | 2.962(3)   | 2.963(3) | 2.961(3) | 2.973(3) | 2.977(4) | 2.979(4) | 3.12(2)  | 2.97(2)   |
|      | -1Sb2  |    | 3.381(2)   | 3.377(3) | 3.360(2) | 3.370(2) | 3.364(2) | 3.363(3) | 3.22(2)  | 3.371(9)  |
|      | -1Sb1  |    | 3.485(2)   | 3.489(3) | 3.495(2) | 3.488(2) | 3.483(2) | 3.475(3) | 3.51(2)  | 3.472(9)  |
|      | -1S3   |    | 2.221(4)   | 2.235(5) | 2.218(5) | 2.242(5) | 2.234(5) | 2.233(5) | 2.24(4)  | 2.23(2)   |
|      | -1S1   |    | 2.231(2)   | 2.227(2) | 2.231(2) | 2.233(2) | 2.231(2) | 2.230(2) | 2.21(2)  | 2.208(7)  |
|      | -1S2   |    | 2.329(4)   | 2.310(4) | 2.307(5) | 2.297(4) | 2.302(4) | 2.290(5) | 2.25(3)  | 2.35(2)   |
| Sb1  | -1Cu9  | 3  | 2.663(3)   | 2.650(3) | 2.659(3) | 2.670(3) | 2.680(3) | 2.696(3) | 2.93(2)  | 2.70(2)   |
|      | -1Cu6  |    | 2.857(2)   | 2.863(3) | 2.850(3) | 2.867(3) | 2.865(3) | 2.862(3) | 2.89(2)  | 3.323(8)  |
|      | -1Sb1  |    | 3.332(2)   | 3.336(3) | 3.333(3) | 3.324(2) | 3.326(3) | 3.310(3) | 3.16(2)  | 3.32(2)   |
|      | -1S7   |    | 2.420(5)   | 2.404(6) | 2.402(6) | 2.414(6) | 2.406(6) | 2.386(6) | 2.41(4)  | 2.45(2)   |
|      | -1S3   |    | 2.423(4)   | 2.419(5) | 2.421(5) | 2.427(4) | 2.420(5) | 2.433(5) | 2.39(4)  | 2.42(2)   |
|      | -1S6   |    | 2.431(5)   | 2.436(6) | 2.458(6) | 2.442(6) | 2.449(6) | 2.467(6) | 2.44(4)  | 2.43(3)   |

Continuation of Table S5.

| 1   | 2      | 3 | $x = 0.05$ |          |          |          |          |          |         | $x = 0.2$ |
|-----|--------|---|------------|----------|----------|----------|----------|----------|---------|-----------|
|     |        |   | 4          | 5        | 6        | 7        | 8        | 9        | 10      | 11        |
| Sb2 | -1S4   | 3 | 2.400(5)   | 2.394(6) | 2.389(6) | 2.400(5) | 2.405(5) | 2.391(6) | 2.41(4) | 2.43(2)   |
|     | -1S2   |   | 2.437(4)   | 2.451(4) | 2.455(5) | 2.455(4) | 2.457(4) | 2.457(5) | 2.48(3) | 2.43(2)   |
|     | -1S5   |   | 2.458(5)   | 2.460(6) | 2.444(7) | 2.468(6) | 2.467(6) | 2.466(6) | 2.52(4) | 2.47(3)   |
| S1  | -1Cu9  | 6 | 3.381(2)   | 3.377(3) | 3.360(2) | 3.370(2) | 3.364(2) | 3.363(3) | 3.22(2) | 3.371(9)  |
|     | -1Cu7  |   | 2.197(3)   | 2.180(4) | 2.222(4) | 2.181(3) | 2.199(4) | 2.213(4) | 2.30(2) | 2.18(2)   |
|     | -2Cu10 |   | 2.231(2)   | 2.227(2) | 2.331(2) | 2.233(2) | 2.231(2) | 2.230(2) | 2.21(2) | 2.208(7)  |
| S2  | -2Cu9  | 4 | 2.247(3)   | 2.245(4) | 2.257(4) | 2.245(3) | 2.244(3) | 2.233(4) | 2.21(2) | 2.20(2)   |
|     | -1Cu6  |   | 2.472(3)   | 2.482(4) | 2.438(4) | 2.481(4) | 2.461(4) | 2.444(4) | 2.34(3) | 2.49(2)   |
|     | -1Cu3  |   | 2.273(4)   | 2.270(5) | 2.276(6) | 2.274(5) | 2.262(5) | 2.268(5) | 2.26(4) | 2.28(2)   |
| S3  | -1Cu10 | 4 | 2.329(4)   | 2.310(4) | 2.307(5) | 2.297(4) | 2.302(4) | 2.290(5) | 2.25(3) | 2.35(2)   |
|     | -1Cu8  |   | 2.341(5)   | 2.360(6) | 2.359(6) | 2.355(5) | 2.342(6) | 2.349(6) | 2.34(4) | 2.35(2)   |
|     | -1Sb2  |   | 2.437(4)   | 2.451(4) | 2.455(5) | 2.455(4) | 2.457(4) | 2.457(5) | 2.48(3) | 2.43(2)   |
| S4  | -1Cu10 | 4 | 2.221(4)   | 2.235(5) | 2.218(5) | 2.242(5) | 2.234(5) | 2.234(5) | 2.24(4) | 2.23(2)   |
|     | -1Cu4  |   | 2.318(5)   | 2.307(6) | 2.297(6) | 2.290(6) | 2.296(6) | 2.270(6) | 2.27(4) | 2.29(2)   |
|     | -1Cu8  |   | 2.350(5)   | 2.360(6) | 2.366(6) | 2.358(6) | 2.375(6) | 2.406(6) | 2.34(4) | 2.33(2)   |
| S5  | -1Sb1  | 4 | 2.423(4)   | 2.419(5) | 2.421(5) | 2.427(4) | 2.420(5) | 2.433(5) | 2.39(4) | 2.42(2)   |
|     | -1Cu5  |   | 2.279(5)   | 2.291(6) | 2.295(6) | 2.292(6) | 2.294(6) | 2.297(6) | 2.25(4) | 2.34(2)   |
|     | -1Cu8  |   | 2.313(5)   | 2.293(6) | 2.303(6) | 2.289(5) | 2.295(6) | 2.324(6) | 2.30(4) | 2.33(2)   |
| S6  | -1Cu9  | 4 | 2.367(5)   | 2.374(6) | 2.368(6) | 2.365(5) | 2.339(6) | 2.315(6) | 2.38(4) | 2.35(2)   |
|     | -1Sb2  |   | 2.400(5)   | 2.394(6) | 2.389(6) | 2.400(5) | 2.405(5) | 2.391(6) | 2.41(4) | 2.43(2)   |
|     | -1Cu7  |   | 2.159(4)   | 2.172(5) | 2.142(5) | 2.176(5) | 2.171(5) | 2.175(5) | 2.14(4) | 2.17(2)   |
| S7  | -1Cu2  | 4 | 2.286(5)   | 2.287(6) | 2.298(6) | 2.294(6) | 2.296(6) | 2.322(6) | 2.29(4) | 2.22(2)   |
|     | -1Cu3  |   | 2.342(4)   | 2.345(5) | 2.351(5) | 2.329(5) | 2.339(5) | 2.308(5) | 2.40(4) | 2.38(2)   |
|     | -1Sb2  |   | 2.458(5)   | 2.460(6) | 2.447(7) | 2.468(6) | 2.449(6) | 2.466(6) | 2.52(4) | 2.47(3)   |
| S8  | -1Cu4  | 4 | 2.292(4)   | 2.316(5) | 2.290(6) | 2.309(5) | 2.322(5) | 2.306(6) | 2.33(4) | 2.33(2)   |
|     | -1Cu6  |   | 2.299(4)   | 2.279(6) | 2.331(6) | 2.284(5) | 2.280(5) | 2.290(6) | 2.31(4) | 2.29(2)   |
|     | -1Cu1  |   | 2.323(5)   | 2.325(6) | 2.304(6) | 2.325(6) | 2.324(6) | 2.312(6) | 2.29(4) | 2.29(2)   |
| S9  | -1Sb1  | 4 | 2.420(5)   | 2.436(6) | 2.458(6) | 2.442(6) | 2.449(6) | 2.467(6) | 2.44(4) | 2.43(3)   |
|     | -1Cu9  |   | 2.234(4)   | 2.235(5) | 2.223(5) | 2.226(5) | 2.247(5) | 2.264(6) | 2.27(4) | 2.19(2)   |
|     | -1Cu8  |   | 2.291(4)   | 2.294(5) | 2.282(6) | 2.292(5) | 2.277(5) | 2.249(6) | 2.26(4) | 2.30(2)   |
| S10 | -1Cu5  | 4 | 2.357(5)   | 2.352(6) | 2.350(7) | 2.361(6) | 2.359(6) | 2.393(7) | 2.37(4) | 2.34(3)   |
|     | -1Sb1  |   | 2.420(5)   | 2.404(6) | 2.402(6) | 2.414(6) | 2.406(6) | 2.386(6) | 2.41(4) | 2.45(2)   |
